1 Effect of children’s BMI on the association between parents’ socio-demographic and  
2 economic characteristics, and Parental perceptions of their child’s weight status in South-  
3 western Sydney: The Growing Healthy Kids Survey, Australia

4 Vilas Kovai<sup>1\*</sup>, Shanley Chong<sup>1</sup>, Bin Jalaludin<sup>1</sup>, Janice Tang<sup>1</sup>, Michelle Camilleri<sup>1</sup>, Margaret  
5 Thomas<sup>2</sup>, Francis Fox<sup>1</sup>, Mandy Williams<sup>1</sup>

6 1 Population Health Service, South West Sydney Local Health District, Liverpool, New  
7 South Wales, Australia

8

9 2 Prevention Research Collaboration, Sydney School of Public Health, Charles Perkins  
10 Centre, The University of Sydney, New South Wales, Australia

11

12

13

14 \*Corresponding author (VK)

15 E-mail: [Vilas.Kovai@health.nsw.gov.au](mailto:Vilas.Kovai@health.nsw.gov.au)

16

17

18

19

20

21

22

23

24

25

**NOTE: This preprint reports new research that has not been certified by peer review and should not be used to guide clinical practice.**

## 26 **Abstract**

### 27 **Background**

28 Parents' perception of children's weight status has been recognised as one of the influencing  
29 factors when planning childhood overweight and obesity prevention programs. We aimed to  
30 examine whether children's BMI modified the association between parents' socio-  
31 demographic and economic characteristics and their perceptions of their children's weight  
32 status in South Western Sydney Local Health District.

### 33 **Methods**

34 We analysed 1,353 parents' perceptions of their child's weight status using the 'Growing  
35 Healthy Kids-Population Health Survey' baseline data. Generalised linear multinomial mixed  
36 models were used to determine the associations. Results are presented as odds ratio and  
37 associated 95% confidence intervals by BMI.

### 38 **Results**

39 This study found that the weight status of about 23% of healthy-weight children, 65% of  
40 overweight children and 55% of obese children was incorrectly perceived by parents. Father as  
41 the primary parent and parents who completed  $\leq 12$  years of school education were less likely  
42 to perceive their overweight or obese children as overweight. Parents who lived in more  
43 disadvantaged areas were more likely to perceive their obese children as overweight. Parents  
44 who lived in moderate disadvantaged areas were less likely to perceive their overweight  
45 children as overweight. Parents who had reported an annual household income between  
46 \$52,000-\$103,999 were more likely to perceive their overweight children as of healthy weight  
47 and parents who reported an annual household income below \$103,999 were twice as likely to  
48 perceive their obese children as having a healthy weight.

## 49 **Conclusion**

50 The findings suggest that there may be benefit in designing interventions that focus on  
51 improving parents' misperception of children's weight status. The groups of parents who  
52 should be prioritised for preventive public health interventions to modify the parental  
53 misperceptions of their child's weight status include a) fathers, b) parents who completed  $\leq 12$   
54 years of school education and parents who had Trade, TAFE or Diploma as educational  
55 qualification, c) parents living in moderately disadvantaged areas and d) parents with low and  
56 high household-income.

57

58

59

60

61

62

63

64

65

66

67

68

69

## 70 **Introduction**

71 Childhood overweight and obesity is a global public health priority <sup>1</sup>. Childhood obesity is  
72 associated with an array of short and long-term effects including deteriorating health and well-  
73 being, bullying by peers, and emotional and mental health issues<sup>2</sup>. Australia has one of the  
74 highest rates of obesity in the world. In 2018, two-thirds of Australian adults and a quarter of  
75 Australian children aged 5-17 years were overweight or obese<sup>3</sup>. Of particular concern is that  
76 Australians live on average 2.7 years less due to overweight and obesity<sup>1</sup>. Additionally,  
77 children who are overweight or obese are more likely to remain overweight or obese in  
78 adulthood<sup>4</sup>. Hence, the prevention of childhood obesity is of utmost importance.

79 Parents' misperception (defined as the discrepancy between measured weight status and  
80 subjective assessment of children's weight status by parents) about their children's weight  
81 status has been recognised as one of the influencing factors when planning childhood  
82 overweight and obesity prevention programs<sup>5</sup>. However, less than 50% of parents accurately  
83 perceive their child's overweight or obese status<sup>6-8</sup> and recent New South Wales (NSW) data  
84 shows that three in four parents of overweight children and nearly one-third of parents of obese  
85 children believed their child was about the right weight<sup>9</sup>. While there has been research  
86 investigating the association between demographic factors including socioeconomic status  
87 (SES) with parental misperception of their child's weight status, the findings are inconsistent.  
88 Evidence from a meta-analysis<sup>8</sup> shows that children's age and weight or body mass index  
89 (BMI) are important moderators of the parent's underestimation of their child's overweight  
90 status and gender, parent's weight and method of perception (visual versus non-visual) were  
91 important moderators of parents underestimation of child's weight status.

92 A meta-synthesis of parental perceptions about a child's weight status<sup>10</sup> reported that parents  
93 are more likely to misperceive a child's weight if they are overweight than if the child is of

94 normal weight, regardless of the child's age. The meta-synthesis also showed that more  
95 mothers compared to fathers, and mothers with lower education, lower household income, and  
96 who hold size-related cultural beliefs (e.g., acceptance of slim daughters and larger body size  
97 for boys) are factors associated with parents' underestimation of child's overweight or obese  
98 status. Parents were more likely to overestimate girls' weight compared to boys<sup>10</sup>.

99 In a recent systematic review of studies investigating parents' perception of their children's  
100 weight, nearly half of the studies found no association between SES and parental  
101 misclassification of children's weight, while others showed mixed results<sup>11</sup>. Parents' correct  
102 identification of their children as overweight and obese is an important aspect of childhood  
103 obesity prevention and management<sup>12, 13</sup>. Parents who acknowledge and are concerned about  
104 their children's weight will be more likely to implement effective changes to their children's  
105 lives and regulate weight gain/reduction<sup>14</sup>.

106 Misperception of children's weight is associated with a lower likelihood that parents intend to  
107 take action to help their children lose weight<sup>15</sup>. Parental misperception may lead to unhealthier  
108 diets and food choices for their children<sup>16-18</sup>. Children whose parents misperceive them to be  
109 overweight have a negative view of their body size and actively try to lose weight compared to  
110 their peers<sup>19</sup>. However, parental misperceptions of being overweight can be stigmatising and  
111 actively harmful in the long term because body dissatisfaction and associated dieting intentions  
112 among adolescents are predictors of future weight gain<sup>20, 21</sup>.

113 Although multiple factors are associated with parental underestimation of overweight and  
114 obesity status, to our knowledge, there are no population-level studies in Australia that  
115 comprehensively examined the child's BMI as an effect modifier on the relationship between  
116 parents' characteristics and the accuracy of parental perception of their child's weight status.

117 Given the high prevalence of childhood overweight and obesity in the state of NSW,  
118 Australia<sup>22</sup>, and our findings that 37% of children in the South Western Sydney Local Health

119 District (SWSLHD) are overweight or obese<sup>23</sup>, a greater understanding of population-level  
120 parental socio-demographic factors including socioeconomic gradient in parental perceptions  
121 of child's weight would be useful to guide state-wide and local health promotion programs that  
122 aim to achieve healthy weight among children.

123 SWSLHD has an estimated population of over 1 million living in its seven Local Government  
124 Areas which include more densely populated areas of Bankstown, Fairfield, Liverpool and  
125 Campbelltown and less densely populated areas of Camden, Wollondilly and Wingecarribee<sup>24</sup>.  
126 An estimated 21% of residents are under 15 years of age and a further 15% are in the 15-24  
127 year age range<sup>24</sup>. SWSLHD also has the largest population of culturally and linguistically  
128 diverse (CALD) communities in NSW, with 42% of residents born overseas, about 51% of  
129 families speaking only English at home and approximately 50% of persons aged over 15 years  
130 earning < AU\$650 per week<sup>24</sup>. Overall, SWSLHD provides health services to a rapidly growing  
131 culturally and linguistically diverse population across a geographical area of approximately  
132 6,243 square kilometres<sup>25</sup>. These demographic features and high rates of childhood overweight  
133 and obesity make SWSLHD an ideal location for this study. This study examined whether  
134 children's BMI modified the association between parent's characteristics (parent's role as  
135 mother or father, parent's country of birth (COB), parent's level of education and parent's SES)  
136 and parental perceptions of their children's BMI (overweight, obese, and healthy weight).

137

138

139

140

141

142

## 143 **Methodology**

### 144 **Ethics Approval & Formal Consent**

145 This study was approved by the Human Research Ethics Committee of South Western Sydney  
146 Local Health District (HE18/078). Informed verbal consent was obtained from all the study  
147 participants (i.e., Parents or carers aged  $\geq 18$  years who could provide the maximum  
148 information about the selected child) before the interviews. The data was collected from  
149 October and November 2018. The data was accessed for research purposes from February 2021  
150 and the authors had no access to information that could identify participants during or after  
151 data collection.

### 152 **Sample**

153 We analysed baseline data from the ‘Growing Healthy Kids-Population Health survey (GHK-  
154 SWS survey, 2018) for this study. The GHK-SWS baseline study—a cross-sectional  
155 population-based survey of parents or carers of children aged 5-16 years in southwestern  
156 Sydney, NSW, Australia.

157 The main paper from the GHK-SWS study presents a detailed description of the study design  
158 and methodology<sup>26</sup>. In brief, the GHK-SWS baseline survey was developed using validated  
159 questions from the 2018 NSW Population Health Survey<sup>27</sup>, NSW Schools Physical Activity  
160 and Nutrition survey<sup>28</sup> and the Make Healthy Normal campaign evaluation surveys<sup>29</sup>. The  
161 baseline survey also included new questions when no other suitable questions were available.  
162 The survey domains included: socio-demographics, health status, parental perception of their  
163 child’s height and weight, consumption of fruit, vegetables and discretionary foods, physical  
164 activity participation and related behaviours, and several knowledge and attitudes questions.  
165 The questionnaire was translated into Arabic, Vietnamese, and Cantonese/Mandarin  
166 (simplified Chinese) as these are the major language groups in SWSLHD. Accredited

167 translators and the GHK team conducted translations and the back translations to ensure the  
168 use of culturally appropriate language by the interviewers. GHK-SWS study data was collected  
169 using a computer-assisted telephone interview (CATI) system.

170 The target population included all households within SWSLHD with children aged 5-16 years.  
171 The sample frame consisted of both landline and mobile telephone numbers of residents. An  
172 age and sex-matched sample size of 1,815 respondents was recruited and included in the  
173 baseline survey. This was based on a power of 0.8 with an alpha of 5% and 28.4% baseline  
174 estimated prevalence<sup>23</sup> of childhood overweight and obesity in residents of south western  
175 Sydney.

176 The primary caregiver (parent/carer who could provide maximum information about the  
177 selected child) was interviewed from each randomly selected household. Interviewers collected  
178 information on the number of eligible children living in the household and their sex and ages.  
179 If the household had more than one eligible child, the interviewer randomly selected one of the  
180 eligible children using the CATI system's random number generation. If the respondent of the  
181 selected household was not available after five calls, the interviewers recorded this as  
182 'household member not available'.

## 183 **Measures**

### 184 Outcome measure

185 This study's main outcome measure was 'parental perceptions of their child's weight status' as  
186 used in the NSW Schools Physical Activity and Nutrition Study<sup>9</sup>. Parents were asked to select  
187 a response to the question "Do you consider your child to be: very underweight, slightly  
188 underweight, at a healthy weight, slightly overweight, very overweight, or not sure". When  
189 parents reported their child as slightly overweight, we classified this as a perception of the child  
190 being overweight, and if the child was reported as very overweight, we classified this as a



191 perception of the child being obese. Children reported as underweight (both self-reported and  
192 perceived) were excluded from the study as the focus of the study was to understand parental  
193 perceptions that their slightly overweight or very overweight child was of a healthy weight.

#### 194 Predictors of interest

195 The study's main predictors of interest were parent's characteristics and SES at both the  
196 household level and area-level. In this paper, parent refers to either mother (73% of  
197 respondents) or father (27% of respondents) and only their responses to survey questions were  
198 included in the analysis. Hence, data from other carer relationships (e.g., grandparents or  
199 relatives) were excluded from the analysis (n=51), which also makes our data comparable with  
200 the other studies that used only parents' data. Parent's characteristics include the parent's  
201 relationship with the child (mother or father), parent's country of birth (Australia-born and  
202 overseas-born), parent's educational attainment 1:  $\leq$ Year 12 of education, 2: Trade, Technical  
203 and Further education (TAFE), or Diploma, and 3: University degree).

204 SES was assessed by two measures: annual household income (before tax), and area-level SES.  
205 Annual household income was grouped into four categories: \$0-\$51,999, \$52,000-\$77,999,  
206 \$78,000-\$103,999 and \$104,000 or more.

207 Area-level SES was measured using the 2016 Index of Relative Socio-Economic Disadvantage  
208 (IRSED) at the postcode level<sup>30</sup>. The IRSED scores were created by the Australian Bureau of  
209 Statistics to compare social and economic disadvantage across geographic areas in Australia.  
210 The index is derived from census variables such as income, educational attainment,  
211 unemployment, and people working in unskilled occupations. IRSED at postcode level was  
212 categorised into tertiles (tertile 1: most disadvantaged/low SES, tertile 2: moderately  
213 disadvantaged/moderate SES, and tertile 3: least disadvantaged/high SES).

#### 214 Effect modifier

215 We tested whether children's BMI status modified the associations between parent's socio-  
216 demographic characteristics and the perception of their child's weight status. Children's BMI  
217 was categorised using the age and sex-specific International Obesity Task Force (IOTF)  
218 definitions <sup>31</sup>: thin ( $BMI < 18 \text{ kg/m}^2$ ), healthy weight ( $18 \text{ kg/m}^2 \leq BMI < 25 \text{ kg/m}^2$ ), overweight  
219 ( $25 \leq BMI < 30 \text{ kg/m}^2$ ) and obese ( $BMI \geq 30 \text{ kg/m}^2$ ). To determine BMI, participants were asked  
220 two questions: 1. How tall is your child without shoes? (in centimetres). 2. How much does  
221 your child weigh without clothes or shoes? (in kilograms).

## 222 Mediators

223 The following three parents' perceptions about childhood obesity and their child's diet were  
224 explored as mediators (see figure 1): a) It's alright for a child aged 5-16 years to be overweight;  
225 b) Drinking sugar-sweetened soft drinks too often as the cause of overweight and obesity in  
226 children; and c) Overall, do you think your child's diet is healthy? Parent's agreement with  
227 each of the first two statements was measured on a 5-point Likert scale (from strongly agree to  
228 strongly disagree) and grouped into three categories: agree (strongly agree and somewhat agree  
229 combined), neither, and disagree (strongly disagree and somewhat disagree combined). The  
230 third statement was measured on a 4-point Likert scale and was grouped into two categories:  
231 yes ('Yes, always' and 'Yes, mostly' combined) and no ('No, not really' and 'Not at all'  
232 combined).

## 233 Data analysis

234 A directed acyclic graph (DAG) was used to identify potential confounders, mediators, and  
235 effect modifiers in the relationship between parent's characteristics, SES, and parental  
236 perceptions of their child's weight status (Figure 1).

237 Following a comprehensive descriptive analysis, the R package "mma" was used to conduct  
238 multiple mediation analysis<sup>32</sup>. Multiple mediation analysis examined the presence of three

239 potential mediators: parents' perception of overweight and obesity, children's overall diet, and  
240 child's eating behaviour. The algorithms for the estimation were repeated 50 times with 500  
241 times of bootstrap resampling. Perception of overweight and obesity, children's overall diet,  
242 and children's eating behaviour were not significant mediators and were included as  
243 confounders in our final model. Proc Glimmix procedure in SAS v9.4<sup>32</sup> was then used to  
244 conduct generalised linear multinomial mixed models together with random intercept  
245 accounting for Local Government Area clustering effects to determine associations between  
246 area disadvantage and parental perceptions of their child's weight status. Parental perceptions  
247 of their child's weight as healthy were used as the reference group. Children's age and gender  
248 were included as confounders in the final model.

249 Effect modification by child's BMI was tested and were all statistically significant ( $p < 0.0001$ ).  
250 Results from the multinomial multilevel regression model are presented as odds ratios (ORs)  
251 and associated 95% confidence intervals (95% CIs) by BMI category. Survey weighting was  
252 used in all analyses to ensure the survey sample was representative of all children living in  
253 SWSLHD.

254

255

256

257

258

259

260

261

## 262 Results

263 The sociodemographic and other characteristics of participants are presented in Table 1. After  
 264 the exclusion of other caregivers (n=51), underweight children (n=224), and children perceived  
 265 as very underweight and slightly underweight (n=254), the study findings are presented from  
 266 the analysis of 1,353 children. Of the total study sample, 56% were aged 5-11 years with a  
 267 mean of 11.0 years (SD=0.12), and 50% were girls. Seventy-three per cent of parents were  
 268 mothers. About half of the parents were born in Australia (51%), approximately one-third had  
 269 completed a university degree, and another one-third had completed Technical and Further  
 270 Education (TAFE) or a diploma degree (33%). About one-third had reported an annual  
 271 household income of less than AUD 52,000. Fifty-five percent of participants lived in the most  
 272 disadvantaged areas and 26% lived in the least disadvantaged areas.

273 On parent-reported height and weight, more than half of the children (55%) were within the  
 274 healthy weight range, 24% were overweight, and 21% were obese. Most parents perceived their  
 275 children as having a healthy weight (77%), and 23% perceived their children as overweight or  
 276 obese. Most parents disagreed that being overweight is all right (79%), agreed that drinking  
 277 sugary drinks too often is the cause of being overweight/obese (90%), and reported their child's  
 278 overall diet to be healthy (89%) (Table 1).

279 Table 1: Descriptive statistics of child's and parent's characteristics, SES at household level and area-  
 280 level, health knowledge and outcome variable, n=1353

281

| Variable                               | Level          | n   | %    |
|----------------------------------------|----------------|-----|------|
| Age                                    | 5-11 years     | 761 | 56.1 |
|                                        | 12-16 years    | 592 | 43.9 |
| Gender                                 | Boys           | 683 | 50.1 |
|                                        | Girls          | 670 | 49.9 |
| Parent                                 | Mother         | 964 | 73.2 |
|                                        | Father         | 389 | 26.8 |
| Parent's country of birth (missing=45) | Australia-born | 695 | 51.0 |
|                                        | Overseas born  | 658 | 49.0 |

|                                                                                              |                            |      |      |
|----------------------------------------------------------------------------------------------|----------------------------|------|------|
| Parent's educational attainment (missing=6)                                                  | <=Year 12                  | 372  | 32.2 |
|                                                                                              | Trade, TAFE, or Diploma    | 467  | 33.0 |
|                                                                                              | University degree          | 508  | 34.9 |
| Annual Household Income-before tax (missing=203)                                             | \$0-\$51,999               | 306  | 33.1 |
|                                                                                              | \$52,000-\$77,999          | 223  | 21.2 |
|                                                                                              | \$78,000-\$103,999         | 222  | 16.5 |
|                                                                                              | \$104,000 or more          | 399  | 29.3 |
| Area – Level SES                                                                             | Most disadvantaged         | 740  | 54.5 |
|                                                                                              | Middle disadvantaged       | 242  | 17.5 |
|                                                                                              | Least disadvantaged        | 371  | 26.0 |
| BMI                                                                                          | Healthy weight             | 743  | 55.1 |
|                                                                                              | Overweight                 | 347  | 24.4 |
|                                                                                              | Obese                      | 263  | 20.5 |
| Health knowledge                                                                             |                            |      |      |
| Child's overweight is all right (missing=2)                                                  | Agree                      | 178  | 13.4 |
|                                                                                              | Neither agree nor disagree | 95   | 7.5  |
|                                                                                              | Disagree                   | 1078 | 79.1 |
| Drinking sugary drinks too often is a cause of overweight/obesity among children (missing=4) | Agree                      | 1206 | 89.9 |
|                                                                                              | Neither agree nor disagree | 47   | 3.0  |
|                                                                                              | Disagree                   | 96   | 7.2  |
| My child's overall diet is healthy (missing=15)                                              | No                         | 165  | 11.5 |
|                                                                                              | Yes                        | 1173 | 88.5 |
| Outcome variable                                                                             |                            |      |      |
| Parent's perception of child's weight (missing=2)                                            | Healthy                    | 1038 | 77.1 |
|                                                                                              | Slight and very overweight | 315  | 22.9 |

282 SES: Socioeconomic status

283 BMI: Body Mass Index

284 TAFE: Technical and Further Education

285

286

287 Overall, 65% of parents (914/1353) perceived their children's weight correctly and 35%

288 perceived their children's weight incorrectly. The weight status of about 23% of healthy-weight

289 children, 65% of overweight children and 55% of obese children was incorrectly perceived by

290 parents. Overall, the sensitivity of the overweight category was 79.4% (95% CI=79.1%-

291 79.7%), and the specificity was 37.1% (95% CI=36.5%-37.6%). The sensitivity of the obese

292 category was 85.1% (95% CI=85.1-85.3%), and the specificity was 40.0% (95% CI=39.4%-

293 40.6%). Finally, the sensitivity of the healthy weight category was 77.1% (95% CI=72.5%-

294 81.8%), and the specificity was 64.6% (95% CI=61.7%-67.6%).

295 Table 2 (unadjusted model) presents the associations between child’s and parent’s  
 296 characteristics, SES at both the household level and the area level, parents’ perceptions about  
 297 childhood obesity and child’s diet and parents' perception on their children’s weight from single  
 298 variable models.

299 Using parental perception of their child as a healthy weight (whether correct or not) as the  
 300 reference group, parents with a female child and child aged 12-16 years were more likely to  
 301 report them to be overweight or obese. Parents who were born overseas, parents who had not  
 302 completed a university degree, parents who reported an annual household income under  
 303 \$51,999, and parents living in the most disadvantaged areas, were more likely to perceive their  
 304 children as overweight or obese (Table 2).

305 Parents who agree childhood overweight and obesity is a problem, disagreed that being  
 306 overweight in childhood is alright, agree that drinking sugary drinks too often is a cause of  
 307 overweight/obesity among children, or thought their child's overall diet was not healthy were  
 308 more likely to perceive their child as overweight or obese (Table 2).

309 Table 2: Associations between child’s and parent’s characteristics, SES at household level and area-  
 310 level, health knowledge and parental perceptions on their children’s weight by children’s BMI  
 311

|                                 |                         | Parents perception of their child’s weight status |      |                     |      |                       | Type 3, p-value |
|---------------------------------|-------------------------|---------------------------------------------------|------|---------------------|------|-----------------------|-----------------|
|                                 |                         | Healthy weight                                    |      | Overweight or Obese |      | Unadjusted OR, 95% CI |                 |
|                                 |                         | n                                                 | %    | n                   | %    |                       |                 |
| Age                             | 5-11 years              | 604                                               | 79.0 | 157                 | 21.0 | 1                     | <.0001          |
|                                 | 12-16 years             | 434                                               | 74.6 | 158                 | 25.4 | 1.35, 1.31-1.39       |                 |
| Sex                             | Boys                    | 524                                               | 78.5 | 159                 | 21.5 | 1                     | <.0001          |
|                                 | Girls                   | 514                                               | 75.6 | 156                 | 24.4 | 1.25, 1.21-1.28       |                 |
| Parent relationship with child  | Mother                  | 744                                               | 77.8 | 220                 | 22.2 | 1                     | 0.779           |
|                                 | Father                  | 294                                               | 74.9 | 95                  | 25.1 | 1.05, 0.97-1.04       |                 |
| Parent's country of birth       | Australia-born          | 549                                               | 79.7 | 146                 | 20.3 | 1                     | <.0001          |
|                                 | Overseas born           | 489                                               | 74.3 | 169                 | 25.7 | 1.15, 1.11-1.18       |                 |
| Parent's educational attainment | <=Year 12               | 305                                               | 76.2 | 95                  | 23.8 | 1.06, 1.02-1.10       | <.0001          |
|                                 | Trade, TAFE, or Diploma | 333                                               | 75.6 | 103                 | 24.4 | 1.15, 1.11-1.19       |                 |

|                                                                                        |                            |     |      |      |      |                 |        |
|----------------------------------------------------------------------------------------|----------------------------|-----|------|------|------|-----------------|--------|
|                                                                                        | University degree          | 392 | 79.1 | 115  | 20.9 | 1               |        |
| Annual household income                                                                | \$0-\$51,999               | 215 | 71.0 | 91   | 29.0 | 1.10, 1.06-1.14 | <.0001 |
|                                                                                        | \$52,000-\$77,999          | 181 | 83.4 | 42   | 16.6 | 0.59, 0.57-0.62 |        |
|                                                                                        | \$78,000-\$103,999         | 175 | 78.8 | 47   | 21.2 | 0.81, 0.77-0.85 |        |
|                                                                                        | \$104,000 or more          | 307 | 76.2 | 92   | 23.8 | 1               |        |
| SES                                                                                    | Most disadvantaged         | 547 | 74.8 | 193  | 25.2 | 1.03, 0.98-1.08 | 0.0001 |
|                                                                                        | Middle disadvantaged       | 186 | 74.8 | 56   | 25.2 | 0.94, 0.89-0.99 |        |
|                                                                                        | Least disadvantaged        | 305 | 86.6 | 66   | 16.4 | 1               |        |
| BMI                                                                                    | Healthy weight             | 671 | 90.5 | 72   | 9.5  | 1               | <.0001 |
|                                                                                        | Overweight                 | 225 | 65.1 | 122  | 34.9 | 4.96, 4.77-5.16 |        |
|                                                                                        | Obese                      | 142 | 55.2 | 121  | 44.8 | 6.94, 6.67-7.21 |        |
| Childhood overweight/obesity is a problem (missing=4)                                  | Agree                      | 914 | 75.5 | 3015 | 24.5 | 1               | <.0001 |
|                                                                                        | Neither agree nor disagree | 49  | 96.2 | 3    | 3.8  | 0.03, 0.02-0.42 |        |
|                                                                                        | Disagree                   | 72  | 87.1 | 11   | 12.9 | 0.39, 0.36-0.43 |        |
| Child being overweight is all right                                                    | Agree                      | 112 | 62.3 | 66   | 37.7 | 2.30, 2.21-2.39 | <.0001 |
|                                                                                        | Neither agree nor disagree | 67  | 73.5 | 28   | 26.5 | 1.48, 1.40-1.56 |        |
|                                                                                        | Disagree                   | 857 | 79.8 | 221  | 20.2 | 1               |        |
| Drinking sugar sweetened soft drinks too often is a cause of overweight among children | Agree                      | 915 | 76.3 | 291  | 23.7 | 1               | <.0001 |
|                                                                                        | Neither agree nor disagree | 42  | 82.0 | 5    | 18.0 | 0.75, 0.69-0.82 |        |
|                                                                                        | Disagree                   | 77  | 83.0 | 19   | 17.0 | 0.74, 0.69-0.79 |        |
| My child's overall diet is healthy (missing=17)                                        | No                         | 91  | 52.7 | 74   | 47.3 | 4.05, 3.89-4.22 | <.0001 |
|                                                                                        | Yes                        | 938 | 80.4 | 235  | 19.6 | 1               |        |

312 SES: Socioeconomic status, BMI: Body Mass Index, TAFE: Technical and Further Education

313

314 Figures 2 and 3 (adjusted models) present the associations between the main predictors of  
 315 interest (i.e., children and parents' characteristics and SES at household and area level) and  
 316 perception of the child's weight by parent-reported BMI weight status after adjusting for  
 317 confounding.

318 Figure 2 shows that Father as the primary parent (overweight: OR=0.60, 95% CI=0.55-0.65;  
319 obese: OR=0.46, 95% CI=0.43-0.50) and parents who completed  $\leq 12$  years of school education  
320 (overweight children: OR=0.18, 95% CI=0.17-0.20; obese: children OR=0.54, 95% CI=0.49-  
321 0.459) were less likely to perceive their overweight or obese children as overweight or obese.  
322 Overseas-born parents were more than twice as likely to perceive their healthy-weight children  
323 as healthy weight (OR=1.70, 95% CI (1.60 -1.80) and obese children as obese (OR=1.30, 95%  
324 CI (1.20 -1.40).

325 Figure 3 shows that parents who lived in more disadvantaged areas were more likely to perceive  
326 their obese children as overweight or obese (most disadvantaged areas: OR=1.65, 95%  
327 CI=1.46-1.86; moderate disadvantaged areas: OR=2.13, 95% CI=1.86-2.45). Parents who lived  
328 in moderate disadvantaged areas were less likely to perceive their overweight children as  
329 overweight or obese (OR=0.54, 95% CI=0.47-0.61). For healthy children, parents who lived in  
330 more disadvantaged areas were less likely to consider their healthy children as healthy (most  
331 disadvantaged areas: OR=0.69, 95% CI=0.63-0.76; moderate disadvantaged areas: OR=0.56,  
332 95% CI=0.50-0.62).

333 Parents who had reported annual household income between \$52,000-\$103,999 were more  
334 likely to perceive their overweight children as healthy (\$52,000-\$77,999: OR=1.39, 95%  
335 CI=1.25-1.54; \$78,000-\$103,999: OR=1.35, 95% CI=1.22-1.52). Parents who reported an  
336 annual household income below \$103,999 were twice as likely to perceive their obese children  
337 as having a healthy weight (\$0-\$51,999: OR=2.04, 95% CI=1.82-2.22.; \$52,000-77,999:  
338 OR=2.38, 95% CI=2.13-2.63).

339

340



## 341 **Discussion**

342 This study explored the effect of children's BMI, on the association between parent's  
343 characteristics, SES (assessed by area-level disadvantage and household-level income) and  
344 parental perception of their children's weight status. In this study, approximately 35% of  
345 parents misperceived their child's weight status (23% for healthy weight children; 65% for  
346 overweight children and 55% for obese children), a finding consistent with previous studies  
347 that a large proportion of parents misperceive their child's weight status <sup>5, 9, 15, 19, 33</sup>, with an  
348 inclination for underestimation.

349 Our study results from the adjusted models show that fathers as the primary care providers,  
350 parents who completed  $\leq 12$  years of school education, and Australian-born parents were more  
351 likely to misperceive their child's weight status. Further, while SES was significantly  
352 associated with parental perception of a child's weight status, the results were inconsistent  
353 when measured using area-level disadvantage and household-level income. We found  
354 contrasting results for these two SES measures.

### 355 **Parents sociodemographic characteristics and perception of their child's** 356 **weight status**

357 Most studies on parents' determinants of misperceptions have mostly included mothers only;  
358 hence mothers' misperception of their child's weight status is well known with a propensity to  
359 underestimate their child's weight <sup>5</sup>. However, in line with some other studies <sup>34, 35</sup>, we found  
360 that fathers are more likely than mothers to misperceive their child's weight status (i.e., fathers  
361 are less likely to consider their overweight and obese children as overweight or obese). We do  
362 not know nor does the existing literature explain this. Hence, further studies are recommended

363 to understand why fathers compared to mothers are more likely to misperceive their child's  
364 weight status.

365 Our finding that parents with lower levels of education are more likely to underestimate the  
366 weight status of their overweight children is consistent with previous reports<sup>5, 34</sup> . A recent  
367 systematic review, however, found that this evidence was mixed with one-third of studies  
368 finding an association and over half finding no association between parental education levels  
369 and parental misperceptions of their child's weight status <sup>5</sup>.

370 Further studies are required to understand why Australian-born parents incorrectly perceive  
371 their overweight or obese children as healthy weight compared to overseas-born parents. A  
372 recent systematic review showed that among the 19 included studies, over half found no  
373 association and one-third found associations between ethnicity and parental misperception of  
374 their children's weight status <sup>5</sup>. As much of the evidence was from the United States of America  
375 (USA)<sup>5</sup>, more studies on the effects of ethnicity and parental perceptions of a child's weight  
376 status need to be conducted in other countries.

377 Literature reviews about the effect of a child's age, gender and parents' perception of a child's  
378 weight status suggest that parents generally overestimate their daughter's weight and  
379 underestimate their son's weight and that parents are less likely to misperceive their child's  
380 weight as children get older <sup>5</sup>. However, our study results show that the children's gender and  
381 age were not significant determinants of parent's perceptions of children's weight status.

## 382 **Parents SES and perception of their child's weight status**

383 Evidence on the association between SES and parental underestimation of their child's  
384 overweight or obese weight status is mixed. Among the 21 studies included in a meta-analysis  
385 <sup>5</sup>, half of the studies found no association; one-third of studies found that parents of low SES  
386 are more likely to underestimate their child's overweight status, and a small number of studies

387 found parents of higher SES are more likely to underestimate their child's overweight status.  
388 It is not clear, however, whether parental misperception was impacted by parents' SES status,  
389 particularly when assessed by household income and area-level disadvantage. We found that  
390 parents who lived in the most and middle disadvantaged areas were less likely to perceive their  
391 healthy-weight children as having healthy weight, and overweight children as having  
392 overweight but more likely to perceive their obese children as slightly overweight or very  
393 overweight than parents who lived in less disadvantaged areas. However, we found opposite  
394 results when household income was considered as an SES measure. We found that parents who  
395 reported the lowest household income (i.e., \$0- 51,999) were less likely to consider their obese  
396 children as slightly overweight or very overweight but more likely to consider their healthy  
397 weight children as healthy weight and overweight children as overweight. Comparing  
398 individual and area measures of SES may produce different outcomes although some studies  
399 of childhood obesity in Australia have reported similar findings for individual and area SES  
400 measures<sup>36</sup>.

#### 401 **Why do parents misperceive their child's weight status?**

402 Although overweight and obesity is a global concern, a child's weight status (healthy or  
403 unhealthy) often goes undetected due to many factors. These include a lack of awareness  
404 among parents about how to correctly determine their child's weight status or the need to do  
405 so <sup>37</sup>, increased societal acceptance of children being overweight as it becomes the norm <sup>19</sup> and  
406 overweight children are typically not perceived to be of concern to parents compared to  
407 children who are identified as obese <sup>19</sup> especially if the overweight children are physically  
408 active and healthy <sup>38</sup>. Consistent with these studies, our study also found that parents are less  
409 likely to consider their child overweight or obese when they do not perceive childhood  
410 overweight or obesity as a problem, do not perceive the consumption of sugar drinks as an  
411 obesogenic factor, or perceive their child's overall diet as healthy.

## 412 **Effects of parent’s misperception of their child’s weight status**

413 The adverse effects of parental misperception of a child’s weight status are well documented<sup>19</sup>,  
414 <sup>39, 40</sup>. If parents do not acknowledge their child is at risk for overweight or obesity and its  
415 associated complications, it is also less likely that they would take measures to support their  
416 children’s healthy lifestyle practices <sup>10</sup>. Further, misclassification of a healthy child as  
417 overweight, obese, or underweight, can lead to negative psychological impacts due to  
418 stigmatisation <sup>19, 40</sup>, reduced interest in physical activity <sup>41</sup> and eating disorders <sup>39</sup>. Hence,  
419 routine screening of weight and height is even more necessary and recommended so that  
420 parents are aware of their child’s correct weight status and developmental concerns over time.

## 421 **Limitations and strengths**

422 There are several limitations of this study. First, this study used the data from parents who self-  
423 reported the height and weight of children which may lead to bias <sup>19</sup>. Parents who did not know  
424 their child’s height and weight were called back to give them time to measure their child.  
425 Nevertheless, the advantage of our self-reported data is that data collection came from a large  
426 representative population sample. In contrast, research with actual measurements from children  
427 usually comes from smaller and less representative samples <sup>15</sup>. Future datasets that include  
428 additional characteristics of participants such as parents’ height and weight, children’s  
429 perception of their weight status, parents’ BMI, the presence of other overweight or obese  
430 children in the family, and characteristics of food and physical environment are warranted.  
431 These factors have previously been found to impact parents’ perceptions of their child’s weight  
432 status <sup>5, 19, 37, 42, 43</sup> and were not measured in this study.

433 The strengths of this study include a large random sample. Another strength of the study was  
434 the information on parental health behaviour perceptions and their association with parent  
435 misperception of children’s weight status, such as parents’ perception of overweight and

436 obesity, children's overall diet, and perceptions of children's eating behaviour. The inclusion  
437 of area-level disadvantage is another strength of this study as this may facilitate population-  
438 level interventions. Nevertheless, as explained elsewhere, further studies are needed to  
439 understand the discrepancy between different SES measures (household income vs area-level  
440 disadvantage) and parent perceptions of their child's weight status.

## 441 **Conclusion**

442 The findings suggest that there may be benefit in designing interventions that focus on  
443 improving parents' misperception of children's weight status. The groups of parents who  
444 should be prioritised for preventive public health interventions to modify the parental  
445 misperceptions of their child's weight status include a) fathers, b) parents who completed  $\leq 12$   
446 years of school education and parents who had Trade, TAFE or Diploma educational  
447 qualifications, c) parents living in moderately disadvantaged areas and d) parents with low and  
448 high household-income. Our findings support the existing strategy that public health  
449 interventions need to continue to focus on the education of families and children about healthy  
450 weight management, and integration of routine weight and height measurements at population  
451 and clinical level settings to help parents develop an accurate awareness of their child's weight  
452 status and overall growth and prevent the risk of chronic disease in the long run. Collecting  
453 SES information at both the population and clinical levels would be useful to guide health  
454 promotion programs that target healthy weight among children.

455  
456  
457  
458  
459  
460  
461

462 **Acknowledgements**

463 We firstly acknowledge the parents and carers of children living in the South West Sydney  
464 Local Health District who generously gave their time to complete the GHK-SWS Survey. We  
465 acknowledge the contribution of McNair Yellow Squares who were contracted by the  
466 University of Sydney to undertake the survey. We also acknowledge the Growing Healthy  
467 Kids Evaluation Advisory Group which contributed to the development of the survey and  
468 analysis of the data. Dr Phil Hughes of Engine Group provided the data weighting. We thank  
469 Francis Fox for conducting grammar, syntax, and associated edits.

470 **Financial Disclosure**

471 We also acknowledge that the GHK study was funded by the New South Wales (NSW)  
472 Ministry of Health, Australia. The funders had no role in study design, data collection and  
473 analysis, decision to publish, or preparation of manuscript.

474 **Declaration of Competing Interest**

475 The authors have declared that no competing interests exist.

476 **Authors' contributions**

477 VK wrote the manuscript and was responsible for the design, drafting, interpretation of data,  
478 and extensive revisions of the manuscript. SC contributed to the design, and methodology,  
479 conducted analysis of data, wrote the results section, reviewing and revisions of the  
480 manuscript. BJ contributed to the design, methodology, results, extensive revisions of the  
481 manuscript and oversaw the data analysis and interpretation. JT, MC, MT, and MW  
482 contributed to the revisions of the manuscript. All authors read and approved the final  
483 manuscript.

484

485

486

487

488

489

490

491

492

## 493 References

494

- 495 1. OECD. The Heavy Burden Of Obesity : The Economics Of Prevention. OECD Ilibrary 2019 14  
496 August 2020]; Available from: <https://www.oecd-ilibrary.org/sites/67450d67->  
497 [en/1/2/4/index.html?itemId=/content/publication/67450d67-](https://www.oecd-ilibrary.org/sites/67450d67-en/1/2/4/index.html?itemId=/content/publication/67450d67-en&csp=77ac5dad9f2cb67b4d2e46c9fc814aa4&itemIGO=oecd&itemContentType=book)  
498 [en&csp=77ac5dad9f2cb67b4d2e46c9fc814aa4&itemIGO=oecd&itemContentType=book;](https://www.oecd-ilibrary.org/sites/67450d67-en&csp=77ac5dad9f2cb67b4d2e46c9fc814aa4&itemIGO=oecd&itemContentType=book)  
499 2019.
- 500 2. Reilly JJ, Kelly J. Long-term impact of overweight and obesity in childhood and adolescence  
501 on morbidity and premature mortality in adulthood: systematic review. *Int J Obes (Lond)*. Jul  
502 2011;35(7):891-898.
- 503 3. NSW Ministry of Health. Snapshot Childhood Overweight and Obesity – Healthy Children  
504 Initiative, November 2018. Accessed on: 17/08/2020.  
505 <https://www.health.nsw.gov.au/heal/Publications/child-obesity-snapshot.pdf>. North  
506 Sydney, NSW; 2018.
- 507 4. Biro FM, Wien M. Childhood obesity and adult morbidities. *Am J Clin Nutr*. May  
508 2010;91(5):1499s-1505s.
- 509 5. Blanchet R, Kengneson CC, Bodnaruc AM, Gunter A, Giroux I. Factors Influencing Parents'  
510 and Children's Misperception of Children's Weight Status: a Systematic Review of Current  
511 Research. *Curr Obes Rep*. Dec 2019;8(4):373-412.
- 512 6. Tompkins CL, Seablom M, Brock DW. Parental Perception of Child's Body Weight: A  
513 Systematic Review. *Journal of Child and Family Studies*. 2014;24(5):1384-1391.
- 514 7. Jones M, Huffer C, Adams T, Jones L, Church B. BMI Health Report Cards: Parents'  
515 Perceptions and Reactions. *Health Promotion Practice*. 11 2018;19(6):896-904.
- 516 8. Lundahl A, Kidwell KM, Nelson TD. Parental underestimates of child weight: a meta-analysis.  
517 *Pediatrics*. Mar 2014;133(3):e689-703.
- 518 9. Hardy LL MS, Drayton BA, Bauman, A,, . NSW Schools Physical Activity and Nutrition Survey  
519 (SPANS) 2015: Full Report. 2016 Sydney: NSW Department of Health. 2015.
- 520 10. Doolen J, Alpert PT, Miller SK. Parental disconnect between perceived and actual weight  
521 status of children: a metasynthesis of the current research. *J Am Acad Nurse Pract*. Mar  
522 2009;21(3):160-166.
- 523 11. Blanchet R, Kengneson CC, Bodnaruc AM, Gunter A, Giroux I. Factors Influencing Parents'  
524 and Children's Misperception of Children's Weight Status: a Systematic Review of Current  
525 Research. *Current Obesity Reports*. Dec 2019;8(4):373-412.
- 526 12. Duncan DT. Parental misperception of their child's weight status: clinical implications for  
527 obesity prevention and control. *Obesity (Silver Spring, Md.)*. 2011;19(12):2293.
- 528 13. Prochaska JO, Diclemente CC, Norcross JC. In search of how people change. Applications to  
529 addictive behaviors. *The American psychologist*. 1992;47(9):1102-1114.
- 530 14. Wake M, Kerr JA, Jansen PW. Child BMI Over Time and Parent-Perceived Overweight.  
531 *Pediatrics*. 12 2018;142(6):12.
- 532 15. Merema MR, Sullivan DL, Pollard CM, Abraham JA, Tomlin SM, Radomiljac AL. Parents'  
533 perception of their child's weight status and intention to intervene: a Western Australian  
534 cross-sectional population survey, 2009-12. *Aust N Z J Public Health*. Feb 2016;40(1):68-70.
- 535 16. Kim LP, Mallo N. Maternal Perceptions of Self-Weight and Child Weight May Influence Milk  
536 Choice of Participants in the Special Supplemental Nutrition Program for Women, Infants,  
537 and Children (WIC). *Journal of Obesity*. 2019;2019:3654728.
- 538 17. Almoosawi S, Jones AR, Parkinson KN, Pearce MS, Collins H, Adamson AJ. Parental  
539 Perception of Weight Status: Influence on Children's Diet in the Gateshead Millennium  
540 Study. *PLoS One*. 2016;11(2):e0144931.

- 541 18. Musaad SM, Donovan SM, Fiese BH, Team SKR. Parental perception of child weight in the  
542 first two years-of-life: a potential link between infant feeding and preschoolers' diet.  
543 *Appetite*. Aug 2015;91:90-100.
- 544 19. Robinson E, Sutin AR. Parental Perception of Weight Status and Weight Gain Across  
545 Childhood. *Pediatrics*. May 2016;137(5).
- 546 20. Robinson E, Sutin AR. Parents' Perceptions of Their Children as Overweight and Children's  
547 Weight Concerns and Weight Gain. *Psychol Sci*. Mar 2017;28(3):320-329.
- 548 21. Sonnevile KR, Calzo, J. P., Horton, N. J., Haines, J., Austin, S. B., & Field, A. E. . Body  
549 satisfaction, weight gain and binge eating among overweight adolescent girls. *International*  
550 *Journal of Obesity & Related Metabolic Disorders: Journal of the International Association for*  
551 *the Study of Obesity*. 2012;36:944-949.
- 552 22. Hardy LL, Mhrshahi, S., Gale, J., Drayton, B. A., Bauman, A., & Mitchell, J., 30-year trends in  
553 overweight, obesity and waist-to-height ratio by socioeconomic status in Australian children,  
554 1985 to 2015. (2005), 41(1), 76–82. <https://doi.org/10.1038/ijo.2016.204>. *Int J Obesity*.  
555 2017.
- 556 23. NSW Health and South Western Sydney Local Health District. Growing Healthy Kids in South  
557 West Sydney: SWSLHD Childhood Overweight and Obesity Prevention and Management  
558 Action Plan (2017 - 2025). ; 2017.
- 559 24. NSW Government. South Western Sydney Local Health District- Health Snapshot 2020.  
560 [https://www.swslhd.health.nsw.gov.au/populationhealth/PH\\_epidemiology/monitoring\\_rep](https://www.swslhd.health.nsw.gov.au/populationhealth/PH_epidemiology/monitoring_report.html)  
561 [ort.html](https://www.swslhd.health.nsw.gov.au/populationhealth/PH_epidemiology/monitoring_report.html). 2020.
- 562 25. South Western Sydney Local Health District. South Westren Sydney Local Health District-Year  
563 in review for 2019-2020; 2020.
- 564 26. Margaret Thomas and Michelle Camilleri (joint lead), Shanley Chong, Vilas Kovai, Mandy  
565 Williams, Bin Jalaludin, Conaty S. A cross-sectional baseline study of childhood overweight  
566 and obesity in a multicultural and disadvantaged Australian population: The 'Growing  
567 Healthy Kids in South West Sydney' 2023. Sydney: SWSLHD-Population Health, NSW Health;  
568 2023 [Manuscript Submitted for Publication].
- 569 27. NSW Government. NSW Population Health Survey, 2018 Questionnaire. Accessed on  
570 29.06.21 from [https://www.health.nsw.gov.au/surveys/adult/Documents/questionnaire-](https://www.health.nsw.gov.au/surveys/adult/Documents/questionnaire-2018.pdf)  
571 [2018.pdf](https://www.health.nsw.gov.au/surveys/adult/Documents/questionnaire-2018.pdf). 2018.
- 572 28. Hardy LL MS, Drayton BA, Bauman, A., NSW Schools Physical Activity and Nutrition Survey  
573 (SPANS) 2015: Full Report. 2016 Sydney: NSW Department of Health. Accessed on 29.06.21  
574 from <https://www.health.nsw.gov.au/heal/Publications/spans-2015-full-report.PDF>. 2015.
- 575 29. NSW Health. Make Healthy Normal Phase 2 – Families Campaign Baseline Survey (version  
576 10). In: Kovai V, ed; 2017.
- 577 30. ABS. Census of Population and Housing: Socio-Economic Indexes for Areas, Australia, 2016.  
578 (Canberra, 2018). 2016.
- 579 31. Cole TJ, Lobstein T. Extended international (IOTF) body mass index cut-offs for thinness,  
580 overweight and obesity. *Pediatr Obes*. Aug 2012;7(4):284-294.
- 581 32. SAS Institute Inc. SAS Institute Inc. SAS/ACCESS® 9.4 Interface to ADABAS: Reference. Cary,  
582 NC: SAS Institute Inc. 2013.
- 583 33. Duncan DT, Hansen AR, Wang W, Yan F, Zhang J. Change in Misperception of Child's Body  
584 Weight among Parents of American Preschool Children. *Child Obes*. Aug 2015;11(4):384-393.
- 585 34. Remmers T, van Grieken A, Renders CM, Hirasing RA, Broeren SM, Raat H. Correlates of  
586 parental misperception of their child's weight status: the 'be active, eat right' study. *PLoS*  
587 *One*. 2014;9(2):e88931.
- 588 35. Jeffery AN, Voss LD, Metcalf BS, Alba S, Wilkin TJ. Parents' awareness of overweight in  
589 themselves and their children: cross sectional study within a cohort (EarlyBird 21). *Bmj*. Jan 1  
590 2005;330(7481):23-24.



- 591 **36.** Schieman S, Pudrovska T, Eccles R. Perceptions of body weight among older adults: analyses  
592 of the intersection of gender, race, and socioeconomic status. *J Gerontol B Psychol Sci Soc*  
593 *Sci*. Nov 2007;62(6):S415-423.
- 594 **37.** Robinson E. Overweight but unseen: a review of the underestimation of weight status and a  
595 visual normalization theory. *Obes Rev*. Oct 2017;18(10):1200-1209.
- 596 **38.** Eli K, Howell K, Fisher PA, Nowicka P. "A little on the heavy side": a qualitative analysis of  
597 parents' and grandparents' perceptions of preschoolers' body weights. *BMJ Open*. Dec 11  
598 2014;4(12):e006609.
- 599 **39.** Puhl R, Suh Y. Stigma and eating and weight disorders. *Curr Psychiatry Rep*. Mar  
600 2015;17(3):552.
- 601 **40.** Brewis AA. Stigma and the perpetuation of obesity. *Soc Sci Med*. Oct 2014;118:152-158.
- 602 **41.** Vartanian LR, Novak SA. Internalized societal attitudes moderate the impact of weight  
603 stigma on avoidance of exercise. *Obesity (Silver Spring)*. Apr 2011;19(4):757-762.
- 604 **42.** Parkinson KN, Reilly JJ, Basterfield L, et al. Mothers' perceptions of child weight status and  
605 the subsequent weight gain of their children: a population-based longitudinal study. *Int J*  
606 *Obes (Lond)*. May 2017;41(5):801-806.
- 607 **43.** Miller D, Johnson W, Miller M, Miller J, Sutin AR. Caregiver perceptions of childhood weight:  
608 demographic moderators and correlates. *Child Care Health Dev*. May 2016;42(3):370-374.

609

610

611

612

613

614

615

616

617

618

619

620

621

622

623

624

625

626

627

628

629

Title: Effect of children’s BMI on the association between parents’ socio-demographic and economic characteristics, and Parental perceptions of their child’s weight status in South-western Sydney: The Growing Healthy Kids Survey, Australia

## Figures

**Figure 1:** A directed acyclic graph (DAG) showing potential confounders, mediators, and effect modifiers in the relationship between predictors of interest and parental perceptions of their children’s weight status.

medRxiv preprint doi: <https://doi.org/10.1101/2024.07.02.24309846>; this version posted July 3, 2024. The copyright holder for this preprint (which was not certified by peer review) is the author/funder, who has granted medRxiv a license to display the preprint in perpetuity. It is made available under a [CC-BY 4.0 International license](https://creativecommons.org/licenses/by/4.0/).

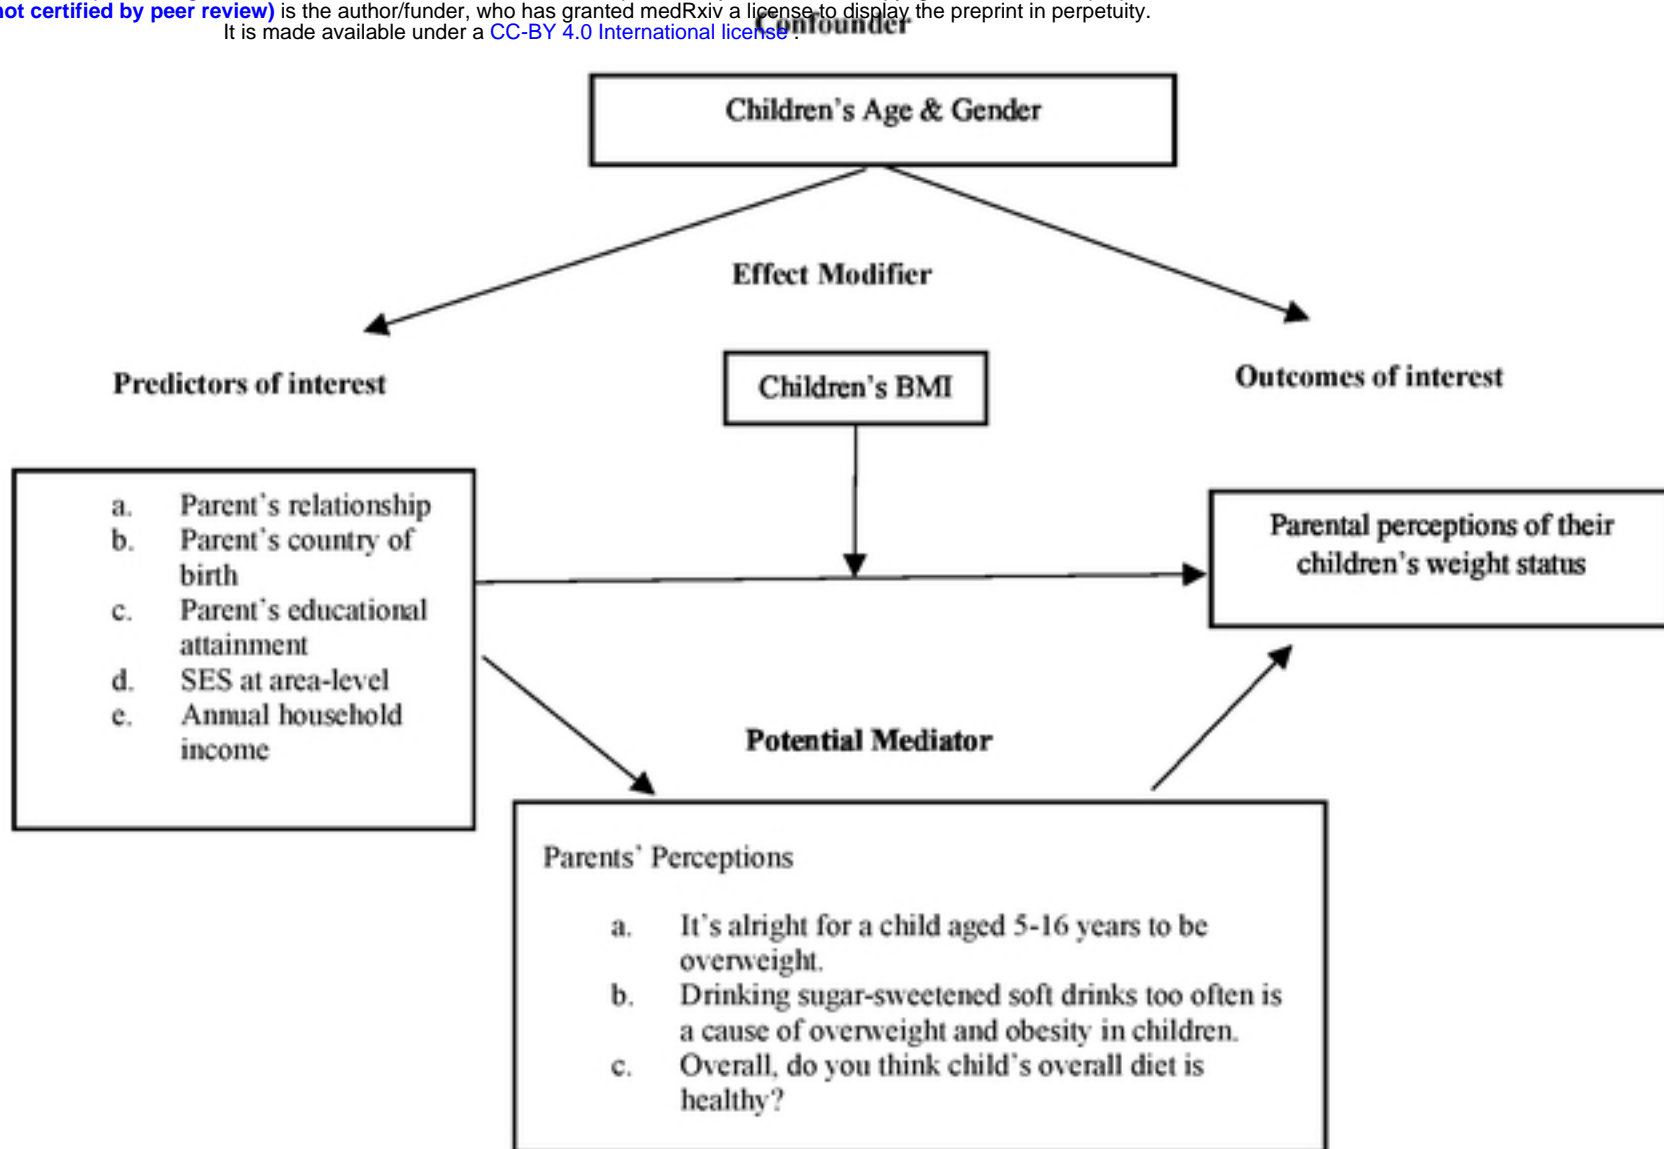

SES: Socio-Economic Status, BMI: Body Mass Index

Figure 2: Associations between parent's characteristics and perception of child's weight by child's BMI\*

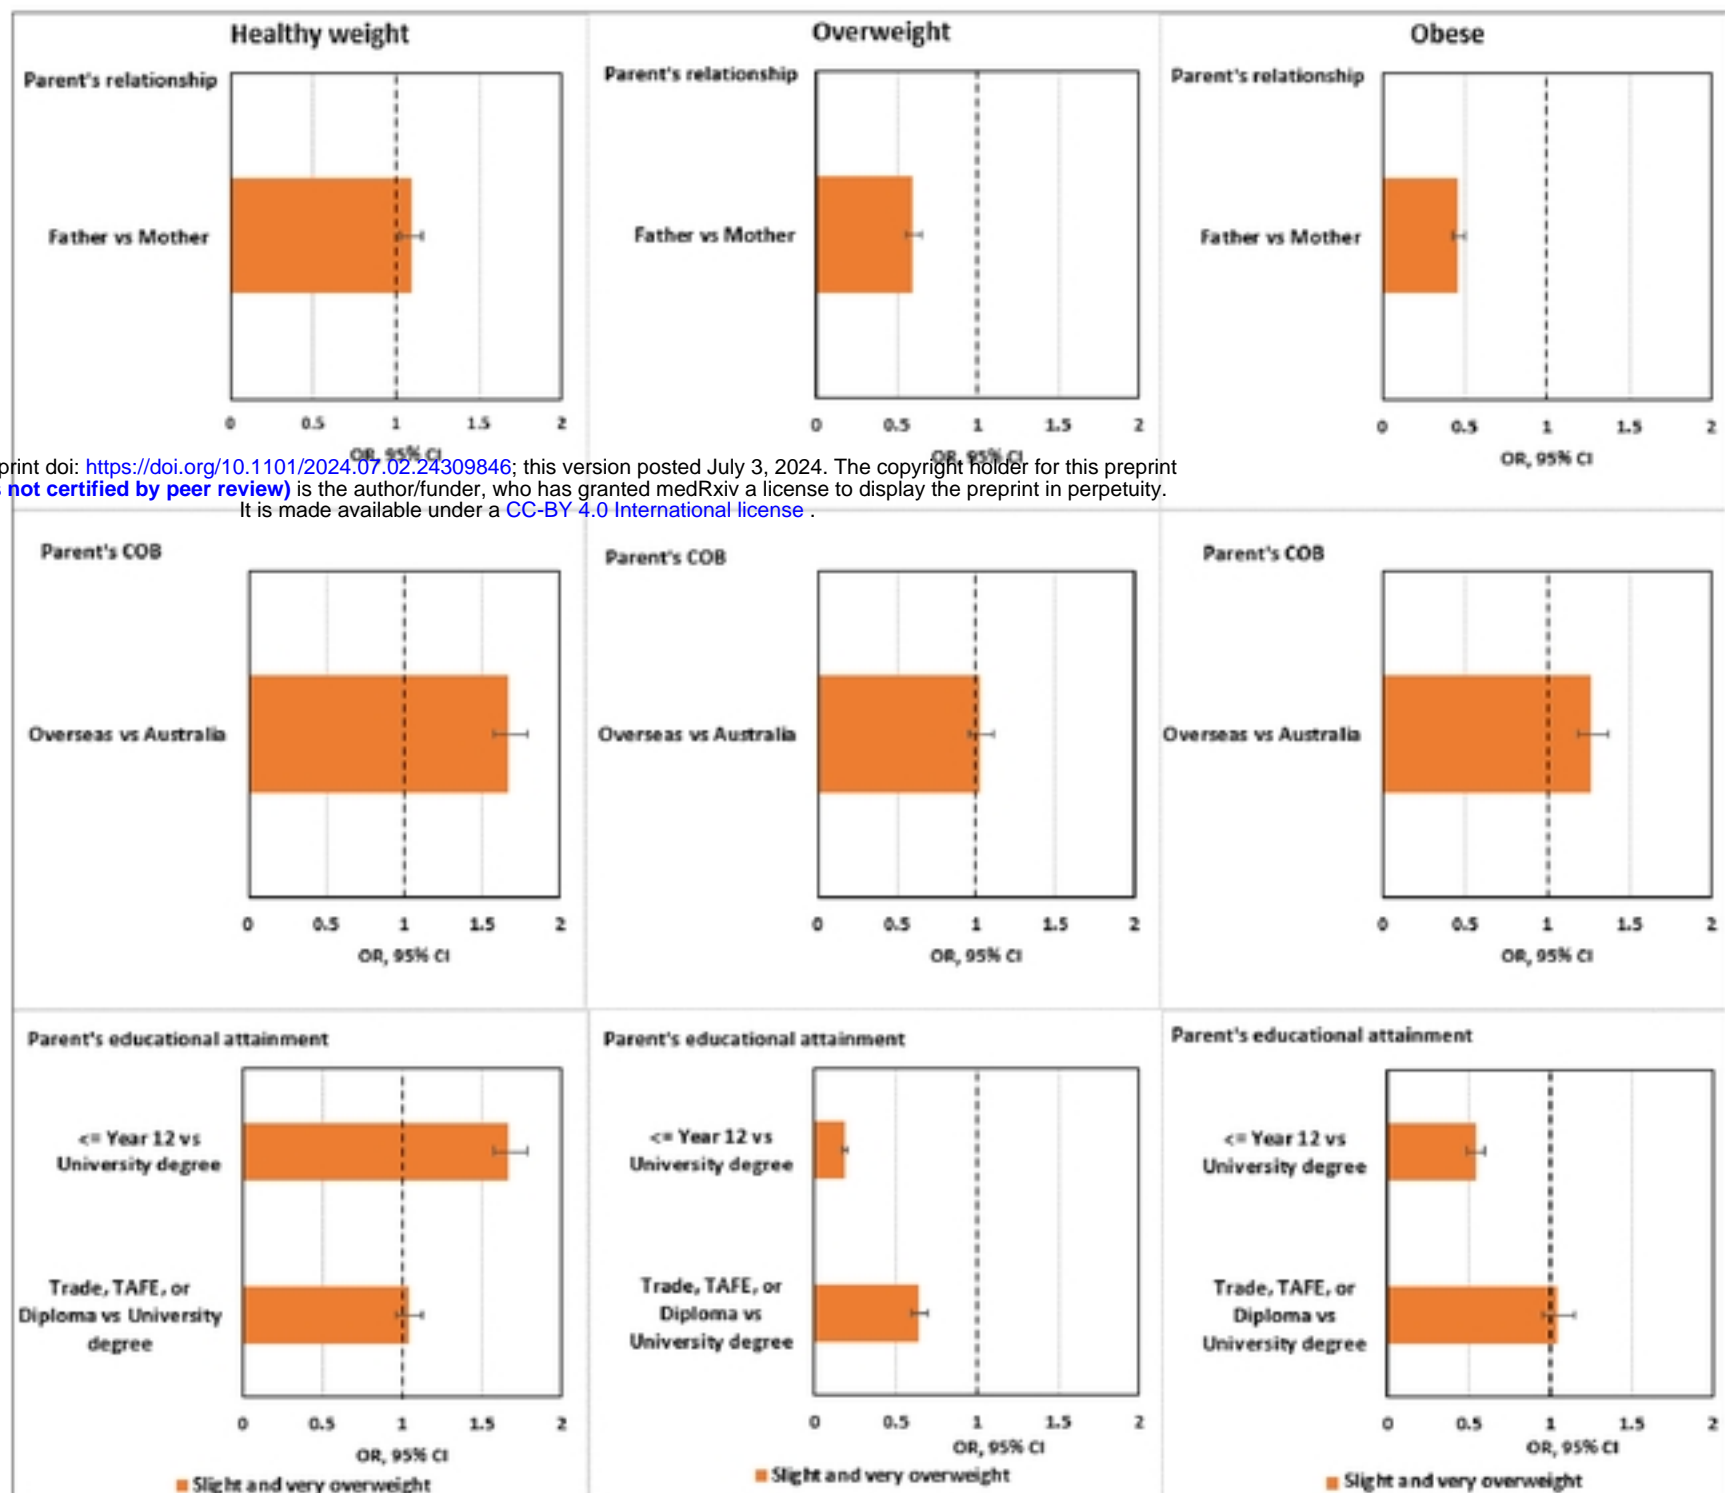

medRxiv preprint doi: <https://doi.org/10.1101/2024.07.02.24309846>; this version posted July 3, 2024. The copyright holder for this preprint (which was not certified by peer review) is the author/funder, who has granted medRxiv a license to display the preprint in perpetuity. It is made available under a [CC-BY 4.0 International license](https://creativecommons.org/licenses/by/4.0/).

\*Adjusted for: children's age, gender, parent's perception of childhood overweight and child's diet: a) It's alright for a child aged 5-16 years to be overweight; b) Drinking sugar-sweetened soft drinks too often as cause of overweight and obesity in children; and c) Overall, do you think your child's diet is healthy?

Figure 3: Associations between SES and Parent's perception of child's weight by child's BMI

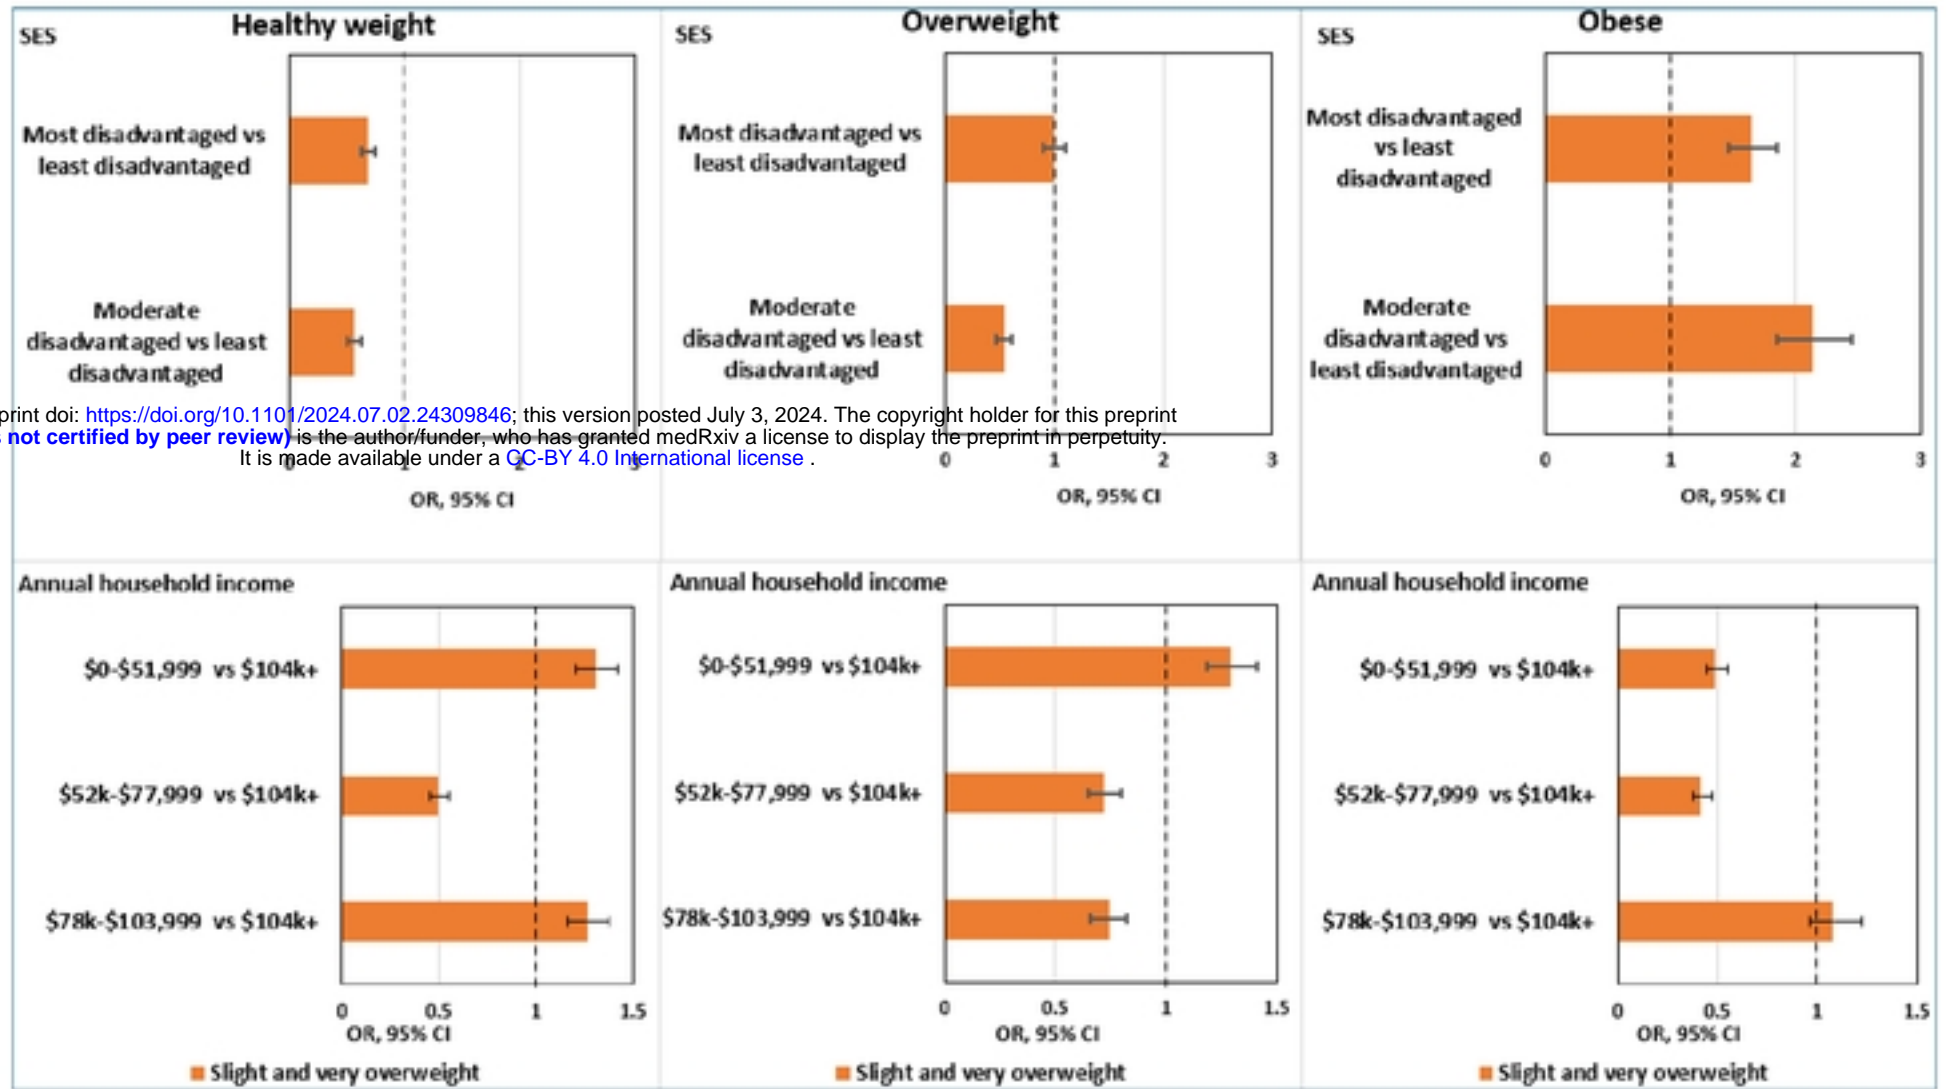

\*Adjusted for: children's age, gender, parent's perception of childhood overweight and child's diet: a) It's alright for a child aged 5-16 years to be overweight; b) Drinking sugar-sweetened soft drinks too often as cause of overweight and obesity in children; and c) Overall, do you think your child's diet is healthy?
